# Supplementary figures and images for: Description of Flexiglena gen. nov. and new members of Discoplastis and Euglenaformis (Euglenida)
Source: PubMed Central journal article supplement — J Phycol. 2021 Feb 25;57(3):766–79. doi: 10.1111/jpy.13107 (PMC8248102; doi:10.1111/jpy.13107), 2021-02-25

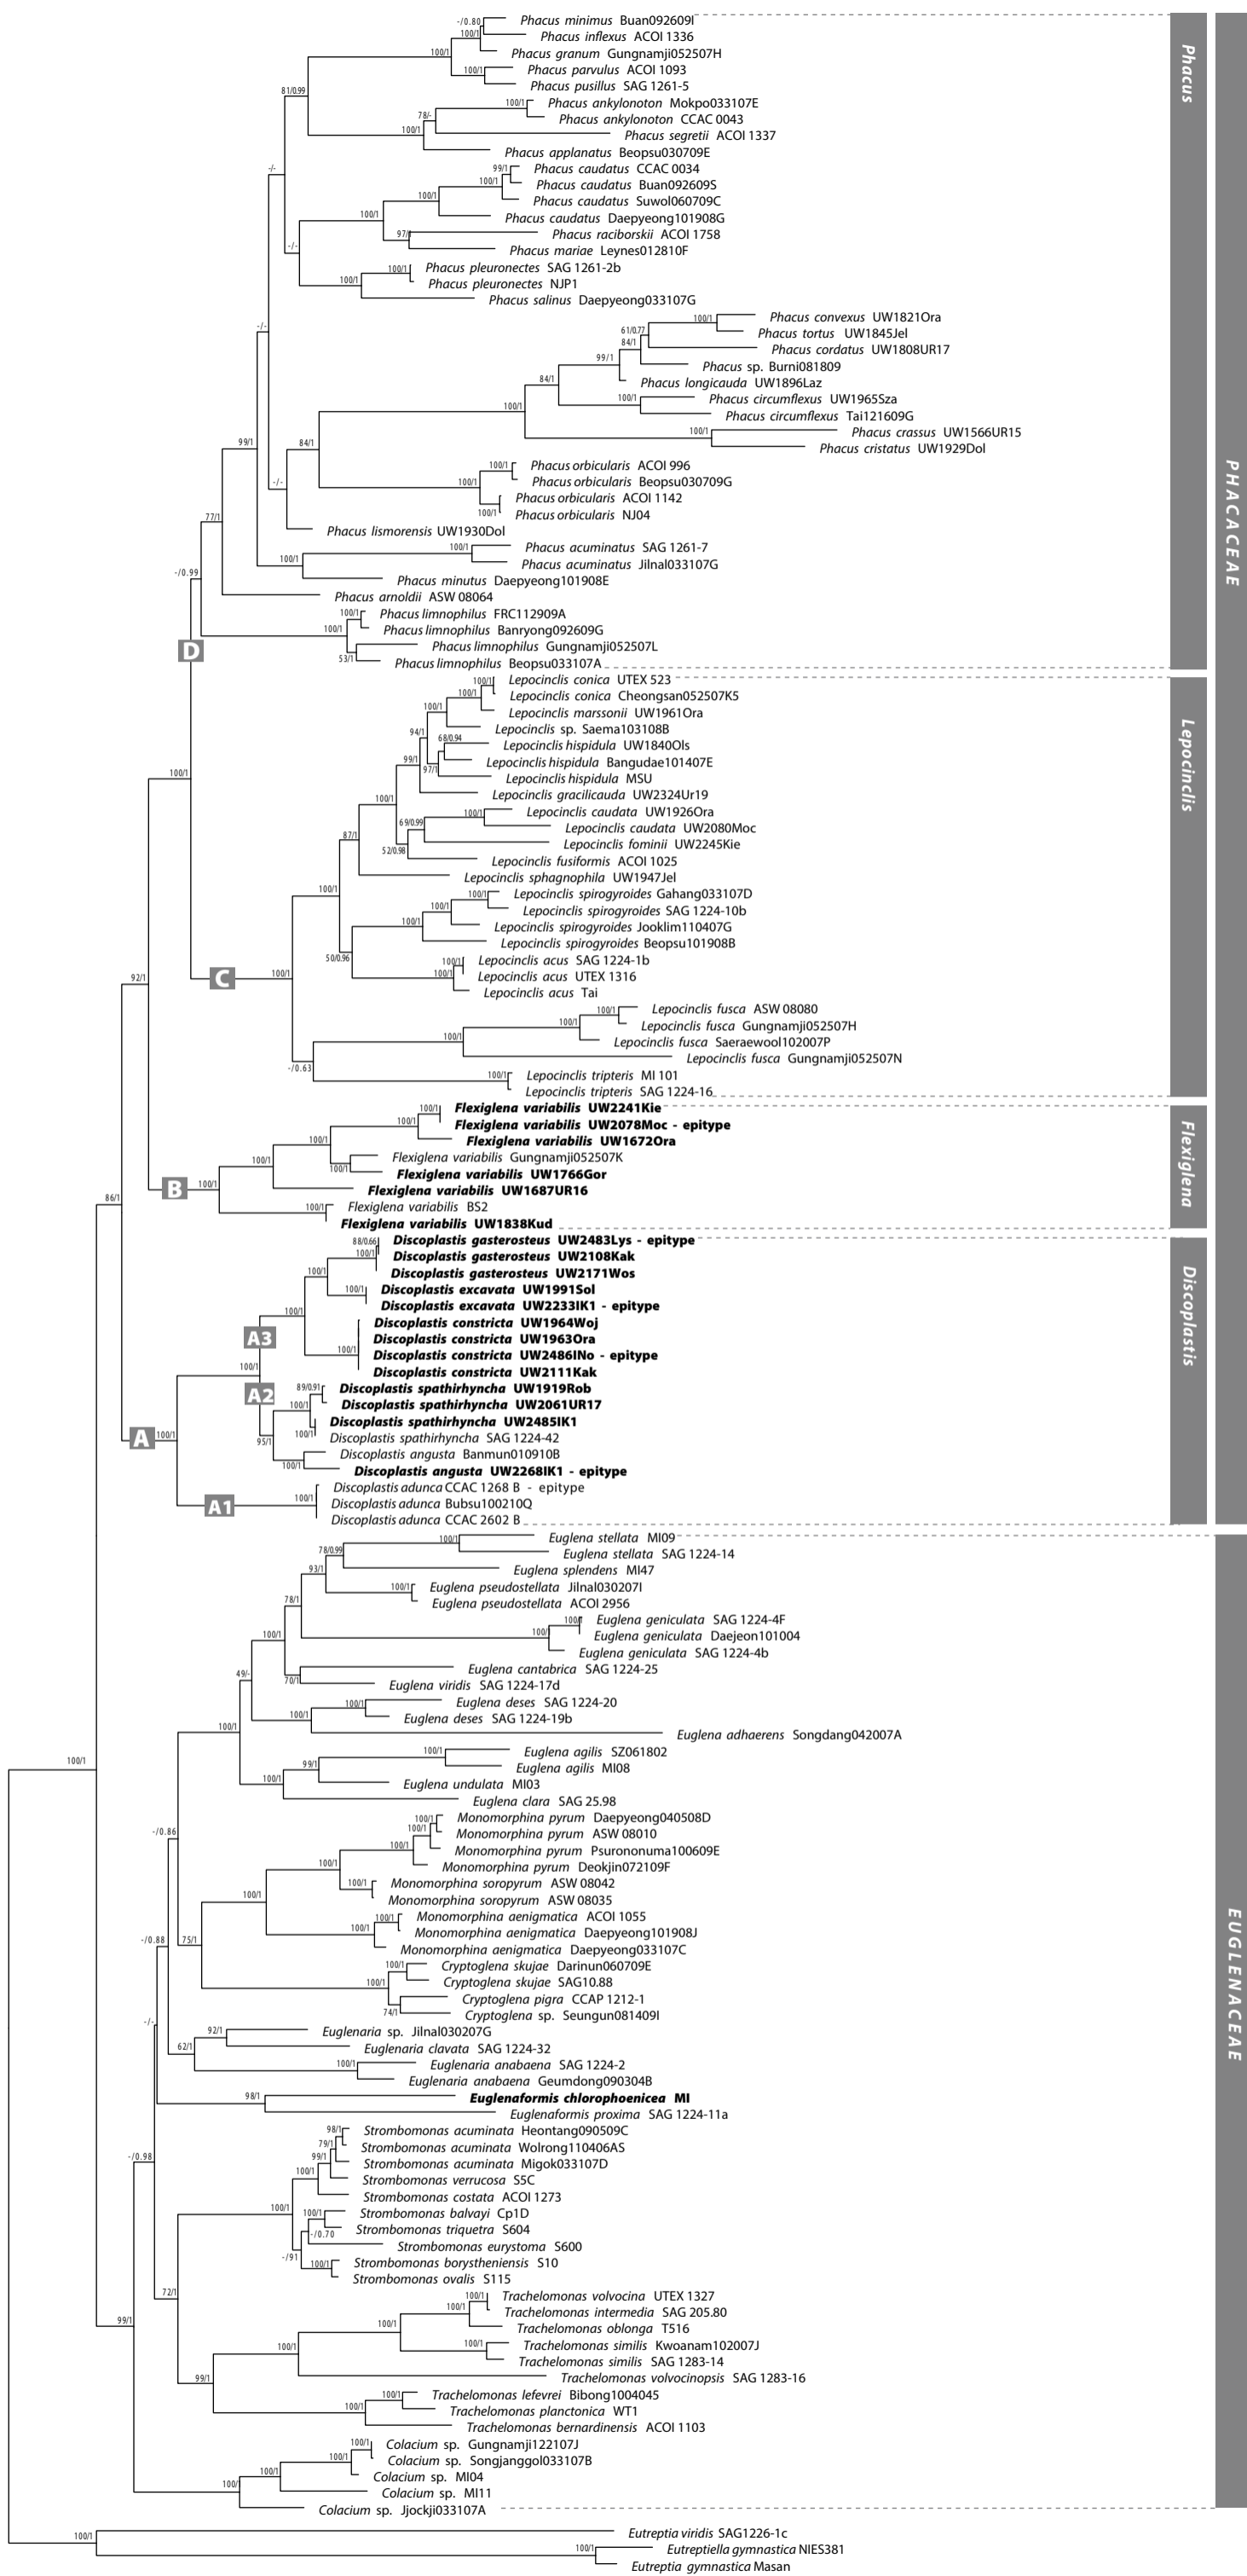

0.05

Supplement: JPY-57-766-s003.pdf [file JPY-57-766-s003.pdf]
